# Supplementary material for: Geometry can provide long-range mechanical guidance for embryogenesis
Source: PLoS Comput Biol. 2017 Mar 27;13(3):e1005443. doi: 10.1371/journal.pcbi.1005443 (PMC5386319; doi:10.1371/journal.pcbi.1005443)
Supplement: S5 Table — The first column contains the abcissae and the second the ordinates, curve 0 can be ignored, other curves are in the same order as in the figure caption. (CSV) [file pcbi.1005443.s008.csv]

# Curve 0 of 4	100 points
# x y type
-1 0 i
-0.964646 0 i
-0.929293 0 i
-0.893939 0 i
-0.858586 0 i
-0.823232 0 i
-0.787879 0 i
-0.752525 0 i
-0.717172 0 i
-0.681818 0 i
-0.646465 0 i
-0.611111 0 i
-0.575758 0 i
-0.540404 0 i
-0.505051 0 i
-0.469697 0 i
-0.434343 0 i
-0.39899 0 i
-0.363636 0 i
-0.328283 0 i
-0.292929 0 i
-0.257576 0 i
-0.222222 0 i
-0.186869 0 i
-0.151515 0 i
-0.116162 0 i
-0.0808081 0 i
-0.0454545 0 i
-0.010101 0 i
0.0252525 0 i
0.0606061 0 i
0.0959596 0 i
0.131313 0 i
0.166667 0 i
0.20202 0 i
0.237374 0 i
0.272727 0 i
0.308081 0 i
0.343434 0 i
0.378788 0 i
0.414141 0 i
0.449495 0 i
0.484848 0 i
0.520202 0 i
0.555556 0 i
0.590909 0 i
0.626263 0 i
0.661616 0 i
0.69697 0 i
0.732323 0 i
0.767677 0 i
0.80303 0 i
0.838384 0 i
0.873737 0 i
0.909091 0 i
0.944444 0 i
0.979798 0 i
1.01515 0 i
1.05051 0 i
1.08586 0 i
1.12121 0 i
1.15657 0 i
1.19192 0 i
1.22727 0 i
1.26263 0 i
1.29798 0 i
1.33333 0 i
1.36869 0 i
1.40404 0 i
1.43939 0 i
1.47475 0 i
1.5101 0 i
1.54545 0 i
1.58081 0 i
1.61616 0 i
1.65152 0 i
1.68687 0 i
1.72222 0 i
1.75758 0 i
1.79293 0 i
1.82828 0 i
1.86364 0 i
1.89899 0 i
1.93434 0 i
1.9697 0 i
2.00505 0 i
2.0404 0 i
2.07576 0 i
2.11111 0 i
2.14646 0 i
2.18182 0 i
2.21717 0 i
2.25253 0 i
2.28788 0 i
2.32323 0 i
2.35859 0 i
2.39394 0 i
2.42929 0 i
2.46465 0 i
2.5 0 i
# Curve 1 of 4	589535 points
# x y type
2.61135 -0.000679317 o
2.58259 -0.000566611 o
1.27273 -0.000617758 i
1.19368 -0.000618065 i
1.19368 -0.000618065 i
0.907422 -0.000624416 i
0.977214 -0.00062198 i
0.977214 -0.00062198 i
1.67476 -0.000625352 i
1.7397 -0.000619242 i
1.7397 -0.000619242 i
-1.98302 2.07386e-08 o
-1.5307 -1.46008e-06 o
-1.54374 -5.87599e-07 o
-1.55629 -4.1301e-07 o
-1.55629 -4.1301e-07 o
-1.55491 -5.74665e-07 o
-1.55491 -5.74665e-07 o
-1.55491 -5.74665e-07 o
-2.37157 2.09095e-08 o
-1.82089 2.007e-08 o
-1.82089 2.007e-08 o
-1.82089 2.007e-08 o
-2.69193 2.12975e-08 o
-2.69193 2.12975e-08 o
-2.57583 2.13995e-08 o
-0.430536 -0.000615952 i
-0.430536 -0.000615952 i
-0.510739 -0.00060874 i
-0.510739 -0.00060874 i
-0.510739 -0.00060874 i
-0.990474 -0.000519733 i
-0.968914 -0.000523395 i
-0.93754 -0.000534015 i
-0.915823 -0.000540461 i
-0.915823 -0.000540461 i
-0.884226 -0.000546188 i
-0.884226 -0.000546188 i
-0.884226 -0.000546188 i
2.70748 -0.000616301 o
0.798411 -0.000626772 i
0.892981 -0.000623517 i
2.59219 -0.000568568 o
2.59219 -0.000568568 o
2.30258 -0.000592316 i
1.63526 -0.000624032 i
1.71775 -0.000621597 i
1.71775 -0.000621597 i
1.5136 -0.000617783 i
1.42982 -0.000619334 i
-0.0048449 -0.000633789 i
-0.191543 -0.000627705 i
-0.191543 -0.000627705 i
0.191505 -0.000635436 i
-0.0048449 -0.000633789 i
-0.0048449 -0.000633789 i
-0.0048449 -0.000633789 i
2.62544 -0.000376434 o
2.62544 -0.000376434 o
2.61135 -0.000679317 o
2.61135 -0.000679317 o
2.61135 -0.000679317 o
2.61135 -0.000679317 o
2.57629 -0.000726951 o
2.58259 -0.000566611 o
2.58259 -0.000566611 o
2.61135 -0.000679317 o
2.61135 -0.000679317 o
2.61135 -0.000679317 o
2.3335 -0.000612935 i
2.31021 -0.000592296 i
2.31021 -0.000592296 i
2.31021 -0.000592296 i
1.35703 -0.000618094 i
1.27273 -0.000617758 i
1.27273 -0.000617758 i
1.51835 -0.000619145 i
1.43817 -0.000612562 i
1.43817 -0.000612562 i
0.737509 -0.000627964 i
0.650646 -0.000628287 i
0.737509 -0.000627964 i
0.737509 -0.000627964 i
0.737509 -0.000627964 i
1.83177 -0.000632803 i
1.83177 -0.000632803 i
1.83177 -0.000632803 i
2.24426 -0.000679434 i
2.25939 -0.000616806 i
2.25939 -0.000616806 i
2.31021 -0.000592296 i
2.31021 -0.000592296 i
2.31021 -0.000592296 i
2.14713 -0.000661966 i
2.14713 -0.000661966 i
2.14713 -0.000661966 i
-1.5307 -1.46008e-06 o
-1.54374 -5.87599e-07 o
-1.55491 -5.74665e-07 o
-1.52818 -1.85694e-06 o
-1.5414 -8.40897e-07 o
-1.5414 -8.40897e-07 o
-1.52557 -1.78156e-06 o
-1.52557 -1.78156e-06 o
-1.52557 -1.78156e-06 o
-2.43712 2.06932e-08 o
-2.4353 2.08614e-08 o
-2.4353 2.08614e-08 o
-2.4353 2.08614e-08 o
-2.26956 2.07317e-08 o
-2.19814 2.0723e-08 o
-2.17287 2.06744e-08 o
-2.14697 2.06669e-08 o
-2.14697 2.06669e-08 o
-2.43712 2.06932e-08 o
-2.4353 2.08614e-08 o
-2.39972 2.04766e-08 o
-2.26956 2.07317e-08 o
-2.26637 2.05418e-08 o
-2.39972 2.04766e-08 o
-2.35414 2.05145e-08 o
-2.35414 2.05145e-08 o
-1.75049 2.05598e-08 o
-1.75896 2.08435e-08 o
-1.77601 2.08036e-08 o
-1.77601 2.08036e-08 o
-1.79271 2.08867e-08 o
-1.79271 2.08867e-08 o
-1.79271 2.08867e-08 o
-1.84467 2.07084e-08 o
-1.84698 2.06706e-08 o
-1.87612 2.06593e-08 o
-1.87612 2.06593e-08 o
-1.90458 2.07266e-08 o
-1.90458 2.07266e-08 o
-1.90458 2.07266e-08 o
-2.56424 2.16823e-08 o
-2.50621 2.10311e-08 o
-2.53653 2.11707e-08 o
-2.56424 2.16823e-08 o
-2.56424 2.16823e-08 o
-2.56424 2.16823e-08 o
-2.56424 2.16823e-08 o
-1.20645 -0.000510036 o
-1.16703 -0.000504969 o
-1.18667 -0.000507569 o
-1.20645 -0.000510036 o
-1.1801 -0.000507155 o
-1.19987 -0.000505847 o
-1.19987 -0.000505847 o
-1.19322 -0.000506745 o
-1.19322 -0.000506745 o
-1.19322 -0.000506745 o
-2.22978 2.05764e-08 o
-2.2839 2.08377e-08 o
-2.2839 2.08377e-08 o
-2.13264 2.0192e-08 o
-2.37157 2.09095e-08 o
-2.35414 2.07559e-08 o
-2.54027 2.14434e-08 o
-2.5209 2.11262e-08 o
-2.63548 2.00304e-08 o
2.62607 -0.000644541 o
2.1643 -0.000685464 i
2.1643 -0.000685464 i
2.23244 -0.000675856 i
2.23244 -0.000675856 i
2.28851 -0.000642321 i
2.28851 -0.000642321 i
2.30258 -0.000592316 i
2.30258 -0.000592316 i
2.30258 -0.000592316 i
1.90172 -0.00064997 i
1.96088 -0.000642624 i
1.96088 -0.000642624 i
1.90172 -0.00064997 i
1.84337 -0.000632981 i
2.04603 -0.000664832 i
2.10653 -0.000661088 i
2.1643 -0.000685464 i
1.42982 -0.000619334 i
1.10846 -0.000620655 i
1.0017 -0.000623692 i
0.892981 -0.000623517 i
2.71414 -0.000151943 o
2.71414 -0.000151943 o
-2.69393 2.02084e-08 o
2.70748 -0.000616301 o
2.69415 -0.000539701 o
2.66591 -0.000209771 o
2.66591 -0.000209771 o
-0.271544 -0.000625309 i
-0.196671 -0.000628451 i
-0.196671 -0.000628451 i
2.39827 -0.000561135 i
2.51808 -0.000585004 o
2.48501 -0.000575722 i
2.48501 -0.000575722 i
1.19368 -0.000618065 i
0.907422 -0.000624416 i
0.822936 -0.000625947 i
0.737509 -0.000627964 i
0.907422 -0.000624416 i
0.977214 -0.00062198 i
0.414344 -0.000632881 i
0.319314 -0.000633959 i
0.319314 -0.000633959 i
0.414344 -0.000632881 i
1.83177 -0.000632803 i
1.83177 -0.000632803 i
1.83177 -0.000632803 i
1.83177 -0.000632803 i
1.83177 -0.000632803 i
1.7397 -0.000619242 i
2.05214 -0.000672789 i
2.14713 -0.000661966 i
2.14713 -0.000661966 i
2.14713 -0.000661966 i
2.14713 -0.000661966 i
2.14713 -0.000661966 i
-0.817345 -0.000563163 i
-0.860259 -0.000552831 i
-0.902968 -0.000542301 i
-0.902968 -0.000542301 i
-0.902968 -0.000542301 i
-0.817345 -0.000563163 i
-2.65102 2.03589e-08 o
-2.30987 2.10757e-08 o
-2.30987 2.10757e-08 o
-2.26956 2.07317e-08 o
-2.26956 2.07317e-08 o
-2.26956 2.07317e-08 o
-1.35354 -8.70005e-05 o
-1.35345 -5.61005e-05 o
-1.35324 -6.18371e-05 o
-1.35328 -5.72816e-05 o
-1.3531 -6.15678e-05 o
-1.3531 -6.15678e-05 o
-1.35295 -5.96405e-05 o
-1.35295 -5.96405e-05 o
-1.35295 -5.96405e-05 o
-1.24233 -0.00052102 o
-1.2498 -0.000506915 o
-1.25722 -0.000502855 o
-1.25652 -0.000510235 o
-1.2639 -0.00051286 o
-1.2639 -0.00051286 o
-1.2705 -0.000503242 o
-1.2705 -0.000503242 o
-1.2705 -0.000503242 o
-1.27409 -0.000518667 o
-2.56424 2.16823e-08 o
-2.56424 2.16823e-08 o
-2.56424 2.16823e-08 o
-0.271544 -0.000625309 i
-0.337327 -0.00062121 i
-0.337327 -0.00062121 i
-0.337327 -0.00062121 i
-0.817345 -0.000563163 i
-0.758937 -0.000574224 i
-0.700112 -0.000584705 i
-0.700112 -0.000584705 i
-0.700112 -0.000584705 i
-0.817345 -0.000563163 i
-0.758937 -0.000574224 i
-0.700112 -0.000584705 i
-2.37157 2.09095e-08 o
-1.35277 -6.46829e-05 o
-1.35232 -5.89314e-05 o
-1.35184 -6.02909e-05 o
-1.3526 -5.96979e-05 o
-1.35211 -6.11211e-05 o
-1.35211 -6.11211e-05 o
-1.35239 -6.05713e-05 o
-1.35239 -6.05713e-05 o
-1.35239 -6.05713e-05 o
-1.35277 -6.46829e-05 o
-1.35314 -7.00277e-05 o
-1.35347 -8.64558e-05 o
-1.35305 -6.99683e-05 o
-1.35337 -7.65834e-05 o
-1.35337 -7.65834e-05 o
-1.35323 -9.41681e-05 o
-1.35323 -9.41681e-05 o
-1.35323 -9.41681e-05 o
-1.05002 -0.000507231 o
-1.06001 -0.000506984 o
-1.08388 -0.000503398 o
-1.08388 -0.000503398 o
-1.11658 -0.000503314 o
-1.08838 -0.000504186 o
-1.08838 -0.000504186 o
-1.06001 -0.000506984 o
-1.06001 -0.000506984 o
-1.06001 -0.000506984 o
-2.21658 2.07484e-08 o
-2.22978 2.05764e-08 o
-2.37157 2.09095e-08 o
-2.43794 2.08905e-08 o
-2.45448 2.11628e-08 o
-2.43794 2.08905e-08 o
-2.45448 2.11628e-08 o
-2.45448 2.11628e-08 o
-2.37157 2.09095e-08 o
-1.72208 1.91781e-08 o
-1.70408 1.90353e-08 o
-1.68543 1.8701e-08 o
-1.70747 1.88028e-08 o
-1.68909 1.85834e-08 o
-1.68909 1.85834e-08 o
-2.69193 2.12975e-08 o
-2.57583 2.13995e-08 o
-2.5589 2.08964e-08 o
-2.54027 2.14434e-08 o
-2.54027 2.14434e-08 o
-2.54027 2.14434e-08 o
-2.54027 2.14434e-08 o
-2.57583 2.13995e-08 o
-2.5589 2.08964e-08 o
-2.54027 2.14434e-08 o
-2.14259 2.072e-08 o
-2.13264 2.0192e-08 o
-2.06065 2.04327e-08 o
-2.02317 2.08473e-08 o
-1.98464 2.01813e-08 o
-1.82089 2.007e-08 o
-0.367318 -0.000619274 i
-0.510739 -0.00060874 i
-0.764808 -0.000573619 i
-0.915823 -0.000540461 i
-0.872864 -0.000550267 i
-0.872864 -0.000550267 i
-0.884226 -0.000546188 i
-0.884226 -0.000546188 i
-0.884226 -0.000546188 i
2.3652 -0.000635557 i
2.41246 -0.000587269 i
2.41246 -0.000587269 i
2.42449 -0.000669407 i
2.42449 -0.000669407 i
2.42449 -0.000669407 i
2.42449 -0.000669407 i
2.45288 -0.00062426 i
2.45288 -0.00062426 i
2.47904 -0.000696566 i
2.47904 -0.000696566 i
2.47904 -0.000696566 i
2.42449 -0.000669407 i
2.47904 -0.000696566 i
2.65842 -0.000386597 o
0.892981 -0.000623517 i
1.0017 -0.000623692 i
1.10846 -0.000620655 i
0.892981 -0.000623517 i
2.47904 -0.000696566 i
2.47904 -0.000696566 i
2.47904 -0.000696566 i
2.65842 -0.000386597 o
2.65842 -0.000386597 o
2.56707 -0.000369978 o
2.54936 -0.000552442 o
2.53675 -0.000681923 o
2.47904 -0.000696566 i
2.47904 -0.000696566 i
2.47904 -0.000696566 i
2.59219 -0.000568568 o
2.56707 -0.000369978 o
2.56707 -0.000369978 o
2.30258 -0.000592316 i
2.30258 -0.000592316 i
2.30258 -0.000592316 i
2.30258 -0.000592316 i
2.3652 -0.000635557 i
2.35248 -0.000602783 i
2.35248 -0.000602783 i
1.77815 -0.000632858 i
1.84337 -0.000632981 i
1.84337 -0.000632981 i
1.77815 -0.000632858 i
1.71775 -0.000621597 i
1.42982 -0.000619334 i
1.28905 -0.000618961 i
1.28905 -0.000618961 i
1.42982 -0.000619334 i
1.10846 -0.000620655 i
1.28905 -0.000618961 i
1.28905 -0.000618961 i
-0.0048449 -0.000633789 i
-0.0048449 -0.000633789 i
0.191505 -0.000635436 i
0.287627 -0.000635202 i
0.414634 -0.000632369 i
0.508 -0.000631509 i
0.287627 -0.000635202 i
0.414634 -0.000632369 i
0.414634 -0.000632369 i
-0.0048449 -0.000633789 i
-0.0048449 -0.000633789 i
-0.0048449 -0.000633789 i
-0.0048449 -0.000633789 i
1.59634 -0.000625612 i
1.51835 -0.000619145 i
2.62544 -0.000376434 o
2.61135 -0.000679317 o
2.61135 -0.000679317 o
2.61135 -0.000679317 o
2.61135 -0.000679317 o
2.61135 -0.000679317 o
2.61135 -0.000679317 o
2.57629 -0.000726951 o
2.55351 -0.000644011 o
2.55351 -0.000644011 o
2.31021 -0.000592296 i
0.216475 -0.000634449 i
0.11133 -0.000634491 i
0.00525608 -0.000633369 i
-0.0866453 -0.000631806 i
0.11133 -0.000634491 i
0.00525608 -0.000633369 i
0.00525608 -0.000633369 i
0.216475 -0.000634449 i
0.319314 -0.000633959 i
0.319314 -0.000633959 i
2.39827 -0.000561135 i
2.42291 -0.000475321 i
2.44845 -0.000513253 i
2.48501 -0.000575722 i
2.42291 -0.000475321 i
2.44845 -0.000513253 i
2.44845 -0.000513253 i
1.43817 -0.000612562 i
1.35703 -0.000618094 i
1.35703 -0.000618094 i
0.737509 -0.000627964 i
0.737509 -0.000627964 i
0.650646 -0.000628287 i
0.907422 -0.000624416 i
0.822936 -0.000625947 i
0.737509 -0.000627964 i
0.737509 -0.000627964 i
0.737509 -0.000627964 i
0.907422 -0.000624416 i
0.907422 -0.000624416 i
0.907422 -0.000624416 i
1.99451 -0.000658333 i
2.05214 -0.000672789 i
2.05214 -0.000672789 i
1.99451 -0.000658333 i
1.99451 -0.000658333 i
1.83177 -0.000632803 i
1.90069 -0.000638038 i
1.90069 -0.000638038 i
1.90069 -0.000638038 i
1.83177 -0.000632803 i
1.83177 -0.000632803 i
1.83177 -0.000632803 i
1.67476 -0.000625352 i
1.59634 -0.000625612 i
1.59634 -0.000625612 i
2.31021 -0.000592296 i
2.3335 -0.000612935 i
2.25939 -0.000616806 i
2.31021 -0.000592296 i
2.31021 -0.000592296 i
2.31021 -0.000592296 i
2.14713 -0.000661966 i
2.17726 -0.000683328 i
2.24426 -0.000679434 i
2.24426 -0.000679434 i
2.17726 -0.000683328 i
2.17726 -0.000683328 i
2.14713 -0.000661966 i
2.14713 -0.000661966 i
2.14713 -0.000661966 i
-1.5307 -1.46008e-06 o
-1.52818 -1.85694e-06 o
-1.52557 -1.78156e-06 o
-1.51552 -1.95037e-06 o
-1.51284 -1.83566e-06 o
-1.51284 -1.83566e-06 o
-1.50108 -1.93927e-06 o
-1.50108 -1.93927e-06 o
-1.50108 -1.93927e-06 o
-2.50621 2.10311e-08 o
-2.50621 2.10311e-08 o
-2.50621 2.10311e-08 o
-2.4353 2.08614e-08 o
-2.47216 2.04847e-08 o
-2.50621 2.10311e-08 o
-2.50621 2.10311e-08 o
-2.47216 2.04847e-08 o
-2.47216 2.04847e-08 o
-2.4353 2.08614e-08 o
-2.4353 2.08614e-08 o
-2.4353 2.08614e-08 o
-2.26956 2.07317e-08 o
-2.19814 2.0723e-08 o
-2.17287 2.06744e-08 o
-2.4353 2.08614e-08 o
-2.4353 2.08614e-08 o
-2.30601 2.06376e-08 o
-2.30987 2.10757e-08 o
-2.26637 2.05418e-08 o
-2.26637 2.05418e-08 o
-2.26956 2.07317e-08 o
-2.26956 2.07317e-08 o
-2.26956 2.07317e-08 o
-2.35414 2.05145e-08 o
-2.30601 2.06376e-08 o
-2.30601 2.06376e-08 o
-1.73063 2.12431e-08 o
-1.7192 2.09072e-08 o
-1.75049 2.05598e-08 o
-1.73918 2.07262e-08 o
-1.73918 2.07262e-08 o
-1.75896 2.08435e-08 o
-1.75896 2.08435e-08 o
-1.75896 2.08435e-08 o
-1.84698 2.06706e-08 o
-2.56424 2.16823e-08 o
-2.50621 2.10311e-08 o
-2.53653 2.11707e-08 o
-2.53653 2.11707e-08 o
-2.56424 2.16823e-08 o
-2.56424 2.16823e-08 o
-2.56424 2.16823e-08 o
-2.50621 2.10311e-08 o
-1.35446 -0.000128432 o
-1.3545 -9.63417e-05 o
-1.23808 -0.000495701 o
-1.25694 -0.000531945 o
-1.35295 -0.000138184 o
-1.35373 -0.000120633 o
-1.34879 -0.00019721 o
-1.35102 -0.000203083 o
-1.35102 -0.000203083 o
-1.33695 -0.000212841 o
-1.33695 -0.000212841 o
-1.33695 -0.000212841 o
-0.990474 -0.000519733 i
-0.93754 -0.000534015 i
-0.93754 -0.000534015 i
-0.884226 -0.000546188 i
-0.884226 -0.000546188 i
-0.884226 -0.000546188 i
-2.22978 2.05764e-08 o
-2.30523 2.04491e-08 o
-2.35414 2.07559e-08 o
-2.37157 2.09095e-08 o
-2.37157 2.09095e-08 o
-2.37157 2.09095e-08 o
-2.22978 2.05764e-08 o
-2.2839 2.08377e-08 o
-2.30523 2.04491e-08 o
-2.30523 2.04491e-08 o
-2.13264 2.0192e-08 o
-1.65241 1.79054e-08 o
-1.64278 1.56152e-08 o
-2.54027 2.14434e-08 o
-2.5209 2.11262e-08 o
-2.54027 2.14434e-08 o
-2.54027 2.14434e-08 o
-2.54027 2.14434e-08 o
-2.57583 2.13995e-08 o
-2.60613 2.16449e-08 o
-2.60613 2.16449e-08 o
-2.60613 2.16449e-08 o
-2.57583 2.13995e-08 o
-2.57583 2.13995e-08 o
-2.57583 2.13995e-08 o
-2.63548 2.00304e-08 o
-1.98464 2.01813e-08 o
-2.02317 2.08473e-08 o
-2.02317 2.08473e-08 o
-2.06065 2.04327e-08 o
-2.06065 2.04327e-08 o
-2.06065 2.04327e-08 o
-2.13264 2.0192e-08 o
-2.09715 2.15006e-08 o
-2.06065 2.04327e-08 o
-2.06065 2.04327e-08 o
-0.191543 -0.000627705 i
2.42449 -0.000669407 i
2.45288 -0.00062426 i
2.47904 -0.000696566 i
2.47904 -0.000696566 i
2.47904 -0.000696566 i
2.41246 -0.000587269 i
2.42449 -0.000669407 i
2.42449 -0.000669407 i
2.42449 -0.000669407 i
1.10846 -0.000620655 i
1.10846 -0.000620655 i
1.63526 -0.000624032 i
2.62607 -0.000644541 o
2.47904 -0.000696566 i
2.47904 -0.000696566 i
2.47904 -0.000696566 i
2.1643 -0.000685464 i
2.1643 -0.000685464 i
2.1643 -0.000685464 i
2.1643 -0.000685464 i
2.30258 -0.000592316 i
2.35248 -0.000602783 i
2.28851 -0.000642321 i
2.30258 -0.000592316 i
2.30258 -0.000592316 i
2.30258 -0.000592316 i
2.028 -0.000661663 i
2.04603 -0.000664832 i
2.04603 -0.000664832 i
2.04603 -0.000664832 i
2.04603 -0.000664832 i
2.028 -0.000661663 i
2.04603 -0.000664832 i
1.96088 -0.000642624 i
2.04603 -0.000664832 i
2.04603 -0.000664832 i
2.10653 -0.000661088 i
2.1643 -0.000685464 i
2.1643 -0.000685464 i
2.1643 -0.000685464 i
1.10846 -0.000620655 i
1.42982 -0.000619334 i
1.5136 -0.000617783 i
1.42982 -0.000619334 i
1.10846 -0.000620655 i
0.892981 -0.000623517 i
0.798411 -0.000626772 i
0.892981 -0.000623517 i
-1.42934 -4.05432e-06 o
-1.74454 1.95487e-08 o
-1.74454 1.95487e-08 o
-1.76636 1.95738e-08 o
-1.76636 1.95738e-08 o
-1.76636 1.95738e-08 o
-1.98464 2.01813e-08 o
-1.9742 2.02476e-08 o
-0.584866 -0.00060048 i
-0.510739 -0.00060874 i
-0.640349 -0.000592891 i
-1.16703 -0.000504969 o
-1.18667 -0.000507569 o
-1.20645 -0.000510036 o
-1.20645 -0.000510036 o
-1.20645 -0.000510036 o
-1.19322 -0.000506745 o
-1.17169 -0.000504773 o
-1.15049 -0.000503505 o
-1.15049 -0.000503505 o
-1.15049 -0.000503505 o
-0.196671 -0.000628451 i
-0.0866453 -0.000631806 i
-0.0866453 -0.000631806 i
-2.68415 2.20802e-08 o
-2.69393 2.02084e-08 o
-2.69393 2.02084e-08 o
-1.35395 -7.65952e-05 o
-1.28327 -0.000443418 o
-1.30252 -0.000426086 o
-1.32703 -0.000168955 o
-1.28993 -0.00045467 o
-1.31082 -0.000316679 o
-1.31082 -0.000316679 o
-1.29692 -0.000457038 o
-1.29692 -0.000457038 o
-1.29692 -0.000457038 o
-1.28327 -0.000443418 o
-1.35272 -2.37417e-05 o
-1.34993 -4.76779e-05 o
-1.34882 -4.55036e-05 o
-1.34979 -4.84475e-05 o
-1.35015 -5.2179e-05 o
-1.34985 -5.76523e-05 o
-1.34969 -5.40268e-05 o
-1.35015 -5.3868e-05 o
-1.3497 -4.958e-05 o
-1.3497 -4.958e-05 o
-1.35025 -5.53378e-05 o
-1.35025 -5.53378e-05 o
-1.35025 -5.53378e-05 o
-1.11658 -0.000503314 o
-1.13348 -0.000502632 o
-1.15049 -0.000503505 o
-1.11216 -0.000503127 o
-0.990474 -0.000519733 i
-1.02535 -0.000511428 o
-1.06001 -0.000506984 o
-1.05002 -0.000507231 o
-1.05002 -0.000507231 o
-1.06001 -0.000506984 o
-1.02535 -0.000511428 o
-1.02535 -0.000511428 o
-0.990474 -0.000519733 i
-0.990474 -0.000519733 i
-0.990474 -0.000519733 i
-1.93636 1.97822e-08 o
-1.89844 2.05122e-08 o
-1.98464 2.01813e-08 o
-1.9742 2.02476e-08 o
-1.9471 2.10662e-08 o
-1.93636 1.97822e-08 o
-1.93636 1.97822e-08 o
-0.367318 -0.000619274 i
-0.430536 -0.000615952 i
-0.510739 -0.00060874 i
-0.510739 -0.00060874 i
-0.510739 -0.00060874 i
-0.764808 -0.000573619 i
-0.711888 -0.000582246 i
-0.640349 -0.000592891 i
-0.640349 -0.000592891 i
-0.764808 -0.000573619 i
-0.884226 -0.000546188 i
-0.824719 -0.000561287 i
-0.764808 -0.000573619 i
-0.813249 -0.000562908 i
-0.764808 -0.000573619 i
-0.764808 -0.000573619 i
-0.764808 -0.000573619 i
-0.711888 -0.000582246 i
-0.711888 -0.000582246 i
-0.764808 -0.000573619 i
-0.764808 -0.000573619 i
-0.764808 -0.000573619 i
-1.26746 -0.00050837 o
-1.28063 -0.00046365 o
-1.29692 -0.000457038 o
-1.27149 -0.000486979 o
-1.28526 -0.000459748 o
-1.28526 -0.000459748 o
-1.29692 -0.000457038 o
-1.31082 -0.000316679 o
-1.32703 -0.000168955 o
-1.31552 -0.000299147 o
-1.33193 -0.000191979 o
-1.33193 -0.000191979 o
-1.33695 -0.000212841 o
-1.33695 -0.000212841 o
-1.33695 -0.000212841 o
-0.968914 -0.000523395 i
-0.990474 -0.000519733 i
-0.884226 -0.000546188 i
-0.884226 -0.000546188 i
-0.884226 -0.000546188 i
-1.49277 -1.05385e-06 o
-1.48532 -2.42804e-06 o
-1.47819 -3.67659e-06 o
-1.48602 -2.63595e-06 o
-1.47888 -3.31617e-06 o
-1.47888 -3.31617e-06 o
-1.47952 -3.0487e-06 o
-1.47952 -3.0487e-06 o
-1.47952 -3.0487e-06 o
-1.60434 3.19479e-08 o
-1.60434 3.19479e-08 o
-1.61842 7.12068e-09 o
-1.61842 7.12068e-09 o
-1.61842 7.12068e-09 o
-1.63572 1.75999e-08 o
-1.61842 7.12068e-09 o
-1.64791 1.62072e-08 o
-1.63068 1.66722e-08 o
-1.63068 1.66722e-08 o
-1.64278 1.56152e-08 o
-1.64278 1.56152e-08 o
-1.64278 1.56152e-08 o
-2.65102 2.03589e-08 o
-2.65102 2.03589e-08 o
-0.556548 -0.000603872 i
-1.35277 -6.46829e-05 o
-1.3526 -5.96979e-05 o
-1.35239 -6.05713e-05 o
-1.35314 -7.00277e-05 o
-1.35298 -6.02481e-05 o
-1.35298 -6.02481e-05 o
-1.35347 -8.64558e-05 o
-1.35347 -8.64558e-05 o
-1.35347 -8.64558e-05 o
-1.35352 -0.000140151 o
-1.35374 -0.000152588 o
-1.35397 -0.000131883 o
-1.35311 -0.000144356 o
-1.35311 -0.000144356 o
2.53675 -0.000681923 o
2.54936 -0.000552442 o
-1.58008 3.32219e-08 o
-1.5639 -1.48902e-07 o
-1.5639 -1.48902e-07 o
-1.56911 -6.48052e-08 o
-1.56911 -6.48052e-08 o
-1.56911 -6.48052e-08 o
-1.4682 -3.52027e-06 o
-1.46643 -3.48787e-06 o
-1.46462 -3.54042e-06 o
-1.46277 -3.48173e-06 o
-1.4609 -3.53813e-06 o
-1.4609 -3.53813e-06 o
-1.45699 -4.00765e-06 o
-1.45699 -4.00765e-06 o
-1.45699 -4.00765e-06 o
-1.46553 -3.72896e-06 o
-1.45985 -3.42454e-06 o
-1.46143 -3.58055e-06 o
-1.46143 -3.58055e-06 o
-1.35304 -6.01638e-05 o
-1.35304 -6.01638e-05 o
-1.35304 -6.01638e-05 o
-1.28327 -0.000443418 o
-1.30252 -0.000426086 o
-1.32703 -0.000168955 o
-1.32703 -0.000168955 o
-1.32703 -0.000168955 o
-1.34079 -0.000223585 o
-1.34079 -0.000223585 o
-1.32703 -0.000168955 o
-1.32703 -0.000168955 o
-1.32703 -0.000168955 o
-1.28327 -0.000443418 o
-1.28993 -0.00045467 o
-1.29692 -0.000457038 o
-1.27504 -0.000487873 o
-1.28063 -0.00046365 o
-1.28063 -0.00046365 o
-1.26746 -0.00050837 o
-1.26746 -0.00050837 o
-1.26746 -0.00050837 o
-1.35395 -7.65952e-05 o
-1.35431 -9.76525e-05 o
-1.35446 -0.000128432 o
-1.35408 -9.94915e-05 o
-1.35421 -0.000136809 o
-1.35421 -0.000136809 o
-1.35397 -0.000131883 o
-1.35397 -0.000131883 o
-1.35397 -0.000131883 o
-1.35304 -6.01638e-05 o
-1.35304 -6.01638e-05 o
-1.35304 -6.01638e-05 o
-1.34969 -5.40268e-05 o
-1.34993 -5.37521e-05 o
-1.35023 -6.07926e-05 o
-1.34991 -6.26599e-05 o
-1.35024 -6.10271e-05 o
-1.35024 -6.10271e-05 o
-1.35025 -5.4169e-05 o
-1.35025 -5.4169e-05 o
-1.35025 -5.4169e-05 o
-1.34969 -5.40268e-05 o
-1.34991 -6.26599e-05 o
-1.35025 -5.4169e-05 o
-1.34962 -5.84315e-05 o
-1.3499 -5.89167e-05 o
-1.3499 -5.89167e-05 o
-1.34958 -5.74191e-05 o
-1.34958 -5.74191e-05 o
-1.34958 -5.74191e-05 o
-1.51442 -1.38693e-06 o
-1.51303 -1.50323e-06 o
-1.50105 -1.57616e-06 o
-1.50105 -1.57616e-06 o
-1.49277 -1.05385e-06 o
-1.49277 -1.05385e-06 o
-1.49277 -1.05385e-06 o
-1.48807 -7.98899e-07 o
-1.48092 -3.31114e-06 o
-1.47385 -3.36365e-06 o
-1.48316 -2.62571e-06 o
-1.47604 -3.71551e-06 o
-1.47604 -3.71551e-06 o
-1.47819 -3.67659e-06 o
-1.47819 -3.67659e-06 o
-1.47819 -3.67659e-06 o
-1.48492 -1.88759e-06 o
-1.48492 -1.88759e-06 o
-1.48492 -1.88759e-06 o
-1.52363 -1.55457e-06 o
-1.5117 -2.01905e-06 o
-1.50078 -1.62469e-06 o
-1.53013 -8.58352e-07 o
-1.51824 -1.31484e-06 o
-1.51824 -1.31484e-06 o
-1.53616 -5.10121e-07 o
-1.53616 -5.10121e-07 o
-1.53616 -5.10121e-07 o
-1.48492 -1.88759e-06 o
-1.49047 -1.29096e-06 o
-1.49047 -1.29096e-06 o
-1.49621 -6.57233e-07 o
-1.49621 -6.57233e-07 o
-1.49621 -6.57233e-07 o
-1.61842 7.12068e-09 o
-1.60415 2.39039e-08 o
-1.58988 -2.335e-09 o
-1.61263 2.12569e-08 o
-1.59833 -4.19202e-09 o
-1.59833 -4.19202e-09 o
-1.5901 1.63037e-08 o
-1.58988 -2.335e-09 o
-1.60434 3.19479e-08 o
-1.60415 2.39039e-08 o
-1.60415 2.39039e-08 o
-1.61842 7.12068e-09 o
-1.61842 7.12068e-09 o
-1.61842 7.12068e-09 o
2.61135 -0.000679317 o
-2.68415 2.20802e-08 o
-2.68415 2.20802e-08 o
2.55351 -0.000644011 o
2.51808 -0.000585004 o
2.51808 -0.000585004 o
2.47904 -0.000696566 i
2.47904 -0.000696566 i
2.47904 -0.000696566 i
-0.817345 -0.000563163 i
-1.35412 -0.000153049 o
-1.35456 -0.000134975 o
-1.3546 -7.6264e-05 o
-1.3546 -7.6264e-05 o
-1.3546 -7.6264e-05 o
-1.59117 4.13304e-09 o
-1.60222 2.01948e-08 o
-1.61325 1.86562e-08 o
-1.59998 2.25267e-08 o
-1.61103 2.23221e-08 o
-1.61103 2.23221e-08 o
-0.556548 -0.000603872 i
-0.48349 -0.000611317 i
-0.48349 -0.000611317 i
-0.817345 -0.000563163 i
-1.76636 1.95738e-08 o
-1.76636 1.95738e-08 o
-1.76636 1.95738e-08 o
-1.82089 2.007e-08 o
-1.7938 1.99294e-08 o
-1.76636 1.95738e-08 o
-1.80575 1.97327e-08 o
-1.77852 1.97061e-08 o
-1.77852 1.97061e-08 o
-1.76636 1.95738e-08 o
-1.7938 1.99294e-08 o
-1.7938 1.99294e-08 o
-1.82089 2.007e-08 o
-1.82089 2.007e-08 o
-1.82089 2.007e-08 o
-1.98464 2.01813e-08 o
-1.9471 2.10662e-08 o
-1.59117 4.13304e-09 o
-1.59998 2.25267e-08 o
-1.58504 1.21968e-08 o
-1.57108 1.55608e-08 o
-1.56134 -1.3334e-07 o
-1.09818 -0.000504117 o
-1.11902 -0.000503725 o
-1.11902 -0.000503725 o
-1.13989 -0.000504868 o
-1.13989 -0.000504868 o
-1.13989 -0.000504868 o
-2.26956 2.07317e-08 o
-2.23453 2.11161e-08 o
-2.19814 2.0723e-08 o
-2.19814 2.0723e-08 o
-2.19814 2.0723e-08 o
-1.98302 2.07386e-08 o
-2.03469 2.06686e-08 o
-2.0228 2.08684e-08 o
-2.0228 2.08684e-08 o
-2.07493 2.06091e-08 o
-2.11711 2.05226e-08 o
-2.03469 2.06686e-08 o
-2.07493 2.06091e-08 o
-2.07493 2.06091e-08 o
-1.82289 2.11014e-08 o
-1.84698 2.06706e-08 o
-1.84698 2.06706e-08 o
-1.84698 2.06706e-08 o
-1.79271 2.08867e-08 o
-1.82004 2.06518e-08 o
-1.84698 2.06706e-08 o
-1.84467 2.07084e-08 o
-1.84467 2.07084e-08 o
-1.82289 2.11014e-08 o
-1.84698 2.06706e-08 o
-1.7957 2.07308e-08 o
-1.82004 2.06518e-08 o
-1.82004 2.06518e-08 o
-1.79271 2.08867e-08 o
-1.79271 2.08867e-08 o
-1.79271 2.08867e-08 o
-1.90458 2.07266e-08 o
-1.93129 2.05333e-08 o
-1.94428 2.08718e-08 o
-1.98302 2.07386e-08 o
-1.98302 2.07386e-08 o
-1.98302 2.07386e-08 o
-1.90401 2.08268e-08 o
-1.93129 2.05333e-08 o
-1.93129 2.05333e-08 o
-1.90458 2.07266e-08 o
-1.90458 2.07266e-08 o
-1.90458 2.07266e-08 o
-1.19322 -0.000506745 o
-1.21571 -0.000515219 o
-1.23808 -0.000495701 o
-1.19322 -0.000506745 o
-1.20645 -0.000510036 o
-1.22232 -0.000509788 o
-1.23808 -0.000495701 o
-1.19987 -0.000505847 o
-1.21571 -0.000515219 o
-1.21571 -0.000515219 o
-1.19322 -0.000506745 o
-1.19322 -0.000506745 o
-1.19322 -0.000506745 o
-2.13264 2.0192e-08 o
-2.14259 2.072e-08 o
-2.17748 2.06374e-08 o
-2.17748 2.06374e-08 o
-2.06065 2.04327e-08 o
2.69415 -0.000539701 o
2.71414 -0.000151943 o
2.71414 -0.000151943 o
-0.938479 -0.000533481 i
-0.967118 -0.000524997 i
-0.981862 -0.000521929 i
-0.981862 -0.000521929 i
-0.902968 -0.000542301 i
-0.935113 -0.000533723 i
-0.967118 -0.000524997 i
-0.90639 -0.000541474 i
-0.938479 -0.000533481 i
-0.938479 -0.000533481 i
-1.35051 -6.14998e-05 o
-1.35031 -5.58485e-05 o
-1.3502 -5.73378e-05 o
-1.3502 -5.69204e-05 o
-1.3502 -5.69204e-05 o
-1.34999 -5.71247e-05 o
-1.34999 -5.71247e-05 o
-1.34999 -5.71247e-05 o
-1.35063 -6.16722e-05 o
-1.35031 -5.58485e-05 o
-1.35031 -5.58485e-05 o
-1.35051 -6.14998e-05 o
-1.35051 -6.14998e-05 o
-1.35051 -6.14998e-05 o
-1.7192 2.09072e-08 o
-1.73063 2.12431e-08 o
-1.70874 2.13185e-08 o
-1.66368 2.16594e-08 o
-1.67154 2.12638e-08 o
-1.6792 2.09007e-08 o
-1.65212 2.18902e-08 o
-1.65996 2.25356e-08 o
-1.65996 2.25356e-08 o
-1.64037 2.13578e-08 o
-1.64037 2.13578e-08 o
-1.64037 2.13578e-08 o
-1.72644 2.0715e-08 o
-1.7192 2.09072e-08 o
-1.70818 2.08925e-08 o
-1.70818 2.08925e-08 o
-1.98302 2.07386e-08 o
-0.556548 -0.000603872 i
-0.556548 -0.000603872 i
-0.48349 -0.000611317 i
-0.700112 -0.000584705 i
-0.628577 -0.000595197 i
-0.556548 -0.000603872 i
-0.556548 -0.000603872 i
-0.556548 -0.000603872 i
-0.700112 -0.000584705 i
-0.700112 -0.000584705 i
-0.700112 -0.000584705 i
-0.556548 -0.000603872 i
-0.700112 -0.000584705 i
-0.628577 -0.000595197 i
-0.556548 -0.000603872 i
-0.700112 -0.000584705 i
-1.35091 -6.02219e-05 o
-1.35057 -5.8966e-05 o
-1.35033 -5.56066e-05 o
-1.35094 -6.01071e-05 o
-1.35062 -5.89059e-05 o
-1.35062 -5.89059e-05 o
-1.35097 -5.94994e-05 o
-1.35097 -5.94994e-05 o
-1.35097 -5.94994e-05 o
-1.35239 -6.05713e-05 o
-1.35189 -5.95036e-05 o
-1.35091 -6.02219e-05 o
-1.35094 -6.01071e-05 o
-1.35097 -5.94994e-05 o
-1.35137 -5.9988e-05 o
-1.3514 -5.9245e-05 o
-1.3514 -5.9245e-05 o
-1.35184 -6.02909e-05 o
-1.35184 -6.02909e-05 o
-1.35184 -6.02909e-05 o
-1.35347 -8.64558e-05 o
-1.35371 -8.55268e-05 o
-1.35395 -7.65952e-05 o
-1.35384 -9.01782e-05 o
-1.35408 -9.94915e-05 o
-1.35408 -9.94915e-05 o
-1.35397 -0.000131883 o
-1.35397 -0.000131883 o
-1.35397 -0.000131883 o
-1.35323 -9.41681e-05 o
-1.35323 -9.41681e-05 o
-1.35345 -0.000112204 o
-1.35352 -0.000140151 o
-1.44685 -3.62527e-06 o
-1.44213 -3.86677e-06 o
-1.44213 -3.86677e-06 o
-1.44213 -3.86677e-06 o
-1.11658 -0.000503314 o
-1.11658 -0.000503314 o
-1.11658 -0.000503314 o
-1.16703 -0.000504969 o
-1.14157 -0.000503357 o
-1.14157 -0.000503357 o
-1.11658 -0.000503314 o
-1.11658 -0.000503314 o
-1.11658 -0.000503314 o
-2.22978 2.05764e-08 o
-2.17748 2.06374e-08 o
-2.21658 2.07484e-08 o
-2.21658 2.07484e-08 o
-1.73532 1.94048e-08 o
-1.72208 1.91781e-08 o
-1.98464 2.01813e-08 o
-1.82089 2.007e-08 o
-1.83292 2.03052e-08 o
-1.86629 2.03002e-08 o
-1.86629 2.03002e-08 o
-1.80575 1.97327e-08 o
-1.83292 2.03052e-08 o
-1.83292 2.03052e-08 o
-1.82089 2.007e-08 o
-1.82089 2.007e-08 o
-1.82089 2.007e-08 o
-0.510739 -0.00060874 i
-1.44743 -3.81685e-06 o
-1.36409 -2.58796e-05 o
-1.35229 -2.44204e-05 o
-1.35472 -2.45826e-05 o
-1.35472 -2.45826e-05 o
-1.35057 -4.685e-05 o
-1.35057 -4.685e-05 o
-1.35057 -4.685e-05 o
-1.44743 -3.81685e-06 o
-1.44072 -3.9562e-06 o
-1.43769 -3.86637e-06 o
-1.43769 -3.86637e-06 o
-1.43288 -5.38623e-06 o
-1.43288 -5.38623e-06 o
-1.43288 -5.38623e-06 o
-1.45951 -3.58632e-06 o
-1.45832 -3.53601e-06 o
-1.45381 -3.98214e-06 o
-1.45381 -3.98214e-06 o
-1.0403 -0.000509832 o
-1.02451 -0.000512297 o
-1.06561 -0.000505987 o
-1.04986 -0.000507422 o
-1.04986 -0.000507422 o
-0.967118 -0.000524997 i
-0.995884 -0.000517743 i
-1.02451 -0.000512297 o
-1.02451 -0.000512297 o
-1.02451 -0.000512297 o
-2.26956 2.07317e-08 o
-2.23453 2.11161e-08 o
-2.23453 2.11161e-08 o
-2.19814 2.0723e-08 o
-2.19814 2.0723e-08 o
-2.19814 2.0723e-08 o
-2.19814 2.0723e-08 o
-1.22005 -0.000512328 o
-1.23277 -0.000512974 o
-1.23277 -0.000512974 o
-1.23277 -0.000512974 o
-1.20677 -0.000511295 o
-1.17094 -0.000506511 o
-1.17414 -0.000507099 o
-1.15533 -0.0005054 o
-1.13989 -0.000504868 o
-1.13989 -0.000504868 o
-1.13989 -0.000504868 o
-1.18906 -0.000508348 o
-1.17094 -0.000506511 o
-2.0228 2.08684e-08 o
-1.98302 2.07386e-08 o
-2.14697 2.06669e-08 o
-2.11711 2.05226e-08 o
-2.11711 2.05226e-08 o
-1.90458 2.07266e-08 o
-1.90458 2.07266e-08 o
-1.90458 2.07266e-08 o
-1.90458 2.07266e-08 o
-1.94428 2.08718e-08 o
-1.94428 2.08718e-08 o
-1.98302 2.07386e-08 o
-1.98302 2.07386e-08 o
-1.98302 2.07386e-08 o
-1.90458 2.07266e-08 o
-1.90458 2.07266e-08 o
-1.87612 2.06593e-08 o
-1.84698 2.06706e-08 o
-1.90401 2.08268e-08 o
-1.35295 -0.000138184 o
-1.35415 -0.000153328 o
-1.35446 -0.000128432 o
-1.35457 -0.000145204 o
-1.35446 -0.000128432 o
-1.35431 -9.76525e-05 o
-1.35395 -7.65952e-05 o
-1.3545 -9.63417e-05 o
-1.33695 -0.000212841 o
-1.35102 -0.000203083 o
-1.33695 -0.000212841 o
-1.33695 -0.000212841 o
-1.33695 -0.000212841 o
-2.22978 2.05764e-08 o
-1.64278 1.56152e-08 o
-1.62476 1.45606e-08 o
-1.62476 1.45606e-08 o
-2.06065 2.04327e-08 o
-2.09715 2.15006e-08 o
-2.09715 2.15006e-08 o
-2.13264 2.0192e-08 o
-2.13264 2.0192e-08 o
-2.13264 2.0192e-08 o
-1.44999 -3.64379e-06 o
-1.45072 -3.76305e-06 o
-1.45143 -3.85761e-06 o
-1.44509 -3.57054e-06 o
-1.44587 -3.53563e-06 o
-1.44587 -3.53563e-06 o
-1.43961 -4.13285e-06 o
-1.43961 -4.13285e-06 o
-1.43961 -4.13285e-06 o
-1.42934 -4.05432e-06 o
-1.4353 -3.41862e-06 o
-1.44058 -3.46656e-06 o
-1.42566 -4.99164e-06 o
-1.43211 -4.94594e-06 o
-1.43211 -4.94594e-06 o
-1.42162 -3.186e-06 o
-1.42162 -3.186e-06 o
-1.42162 -3.186e-06 o
-1.44999 -3.64379e-06 o
-1.44509 -3.57054e-06 o
-1.43961 -4.13285e-06 o
-1.4455 -3.71835e-06 o
-1.44011 -3.73131e-06 o
-1.44011 -3.73131e-06 o
-1.44058 -3.46656e-06 o
-1.44058 -3.46656e-06 o
-1.44058 -3.46656e-06 o
-1.39015 -1.37073e-05 o
-1.39672 -1.45003e-05 o
-1.40287 -1.09656e-05 o
-1.38136 -2.0971e-05 o
-1.3882 -1.58296e-05 o
-1.3882 -1.58296e-05 o
-1.37274 -3.45967e-05 o
-1.37274 -3.45967e-05 o
-1.37274 -3.45967e-05 o
-1.42162 -3.186e-06 o
-1.40611 -1.01359e-05 o
-1.41524 -9.09437e-06 o
-1.39773 -1.50029e-05 o
-1.39773 -1.50029e-05 o
-1.40802 -8.1359e-06 o
-1.40802 -8.1359e-06 o
-1.40802 -8.1359e-06 o
-1.39702 -1.63902e-05 o
-1.38504 -2.04111e-05 o
-1.37298 -3.31758e-05 o
-1.38538 -1.86858e-05 o
-1.37329 -3.46875e-05 o
-1.37329 -3.46875e-05 o
-1.37359 -3.45819e-05 o
-1.37359 -3.45819e-05 o
-1.37359 -3.45819e-05 o
-1.40802 -8.1359e-06 o
-1.40272 -1.31434e-05 o
-1.39702 -1.63902e-05 o
-1.41422 -5.72708e-06 o
-1.40944 -4.77839e-06 o
-1.40944 -4.77839e-06 o
-1.41972 -8.79053e-06 o
-1.41972 -8.79053e-06 o
-1.41972 -8.79053e-06 o
-0.990474 -0.000519733 i
-0.990474 -0.000519733 i
-0.990474 -0.000519733 i
-1.70422 1.89969e-08 o
-1.68543 1.8701e-08 o
-1.72233 1.91474e-08 o
-1.70408 1.90353e-08 o
-1.70408 1.90353e-08 o
-1.72208 1.91781e-08 o
-1.72208 1.91781e-08 o
-1.72208 1.91781e-08 o
-1.76636 1.95738e-08 o
-1.74433 1.95816e-08 o
-1.72208 1.91781e-08 o
-1.75748 1.95881e-08 o
-1.73532 1.94048e-08 o
-1.73532 1.94048e-08 o
-1.72233 1.91474e-08 o
-1.72208 1.91781e-08 o
-1.74454 1.95487e-08 o
-1.74433 1.95816e-08 o
-1.74433 1.95816e-08 o
-1.76636 1.95738e-08 o
-1.76636 1.95738e-08 o
-1.76636 1.95738e-08 o
-1.20645 -0.000510036 o
-1.22639 -0.000508012 o
-1.22232 -0.000509788 o
-1.24218 -0.000522933 o
-1.24218 -0.000522933 o
-1.23808 -0.000495701 o
-1.23808 -0.000495701 o
-1.23808 -0.000495701 o
-1.22639 -0.000508012 o
-1.22639 -0.000508012 o
-1.20645 -0.000510036 o
-1.20645 -0.000510036 o
-1.20645 -0.000510036 o
-1.15049 -0.000503505 o
-1.16703 -0.000504969 o
-1.1801 -0.000507155 o
-1.19322 -0.000506745 o
-1.15877 -0.000504339 o
-1.17169 -0.000504773 o
-1.17169 -0.000504773 o
-1.15049 -0.000503505 o
-1.15049 -0.000503505 o
-1.15049 -0.000503505 o
-1.70422 1.89969e-08 o
-1.68543 1.8701e-08 o
-1.68543 1.8701e-08 o
-1.68543 1.8701e-08 o
-1.68909 1.85834e-08 o
-1.68543 1.8701e-08 o
-1.67381 1.73566e-08 o
-1.67381 1.73566e-08 o
-1.32703 -0.000168955 o
-1.34491 -0.000194883 o
-1.35295 -0.000138184 o
-1.33193 -0.000191979 o
-1.34879 -0.00019721 o
-1.34879 -0.00019721 o
-1.33695 -0.000212841 o
-1.33695 -0.000212841 o
-1.33695 -0.000212841 o
-1.28327 -0.000443418 o
-1.25687 -0.000503733 o
-1.27504 -0.000487873 o
-1.27504 -0.000487873 o
-1.26746 -0.00050837 o
-1.26746 -0.00050837 o
-1.26746 -0.00050837 o
-1.25687 -0.000503733 o
-1.26746 -0.00050837 o
-1.24218 -0.000522933 o
-1.25285 -0.000535164 o
-1.25285 -0.000535164 o
-1.23808 -0.000495701 o
-1.23808 -0.000495701 o
-1.23808 -0.000495701 o
-1.28327 -0.000443418 o
-1.35239 -5.97289e-05 o
-1.35033 -5.56066e-05 o
-1.35033 -5.56066e-05 o
-1.35033 -5.56066e-05 o
-1.34958 -5.74191e-05 o
-1.34929 -5.8858e-05 o
-1.35149 -4.34645e-05 o
-1.34938 -4.80354e-05 o
-1.35469 -1.84191e-05 o
-1.35033 -4.85126e-05 o
-1.35033 -4.85126e-05 o
-1.35248 -2.50021e-05 o
-1.35248 -2.50021e-05 o
-1.35248 -2.50021e-05 o
-1.34958 -5.74191e-05 o
-1.34929 -5.8858e-05 o
-1.34935 -5.78406e-05 o
-1.34913 -5.61979e-05 o
-1.34913 -5.61979e-05 o
-1.34932 -4.79294e-05 o
-1.34932 -4.79294e-05 o
-1.34932 -4.79294e-05 o
-1.06001 -0.000506984 o
-1.08838 -0.000504186 o
-1.11658 -0.000503314 o
-1.08388 -0.000503398 o
-1.11216 -0.000503127 o
-1.11216 -0.000503127 o
-1.11658 -0.000503314 o
-1.14157 -0.000503357 o
-1.16703 -0.000504969 o
-1.13348 -0.000502632 o
-1.15877 -0.000504339 o
-1.15877 -0.000504339 o
-1.15049 -0.000503505 o
-1.15049 -0.000503505 o
-1.15049 -0.000503505 o
-1.06001 -0.000506984 o
-1.86629 2.03002e-08 o
-1.89844 2.05122e-08 o
-1.89844 2.05122e-08 o
-1.28526 -0.000459748 o
-1.29692 -0.000457038 o
-1.30553 -0.000371338 o
-1.30553 -0.000371338 o
-1.23808 -0.000495701 o
-1.25285 -0.000535164 o
-1.26746 -0.00050837 o
-1.25694 -0.000531945 o
-1.27149 -0.000486979 o
-1.27149 -0.000486979 o
-1.29692 -0.000457038 o
-1.31552 -0.000299147 o
-1.33695 -0.000212841 o
-1.30553 -0.000371338 o
-1.23808 -0.000495701 o
-1.36453 -2.46773e-05 o
-1.35995 -1.73349e-05 o
-1.37585 -2.59193e-05 o
-1.37585 -2.59193e-05 o
-1.36978 -3.1205e-05 o
-1.36978 -3.1205e-05 o
-1.36978 -3.1205e-05 o
-1.3564 -2.03588e-05 o
-1.36978 -3.1205e-05 o
-1.35314 -1.92286e-05 o
-1.36323 -2.49366e-05 o
-1.36323 -2.49366e-05 o
-1.35809 -9.88707e-06 o
-1.35809 -9.88707e-06 o
-1.35809 -9.88707e-06 o
-1.47952 -3.0487e-06 o
-1.47394 -3.67118e-06 o
-1.4682 -3.52027e-06 o
-1.47301 -3.54281e-06 o
-1.46728 -3.65183e-06 o
-1.46728 -3.65183e-06 o
-1.46635 -3.72011e-06 o
-1.46635 -3.72011e-06 o
-1.46635 -3.72011e-06 o
-1.47819 -3.67659e-06 o
-1.47327 -3.75958e-06 o
-1.4682 -3.52027e-06 o
-1.47888 -3.31617e-06 o
-1.47394 -3.67118e-06 o
-1.47394 -3.67118e-06 o
-1.47952 -3.0487e-06 o
-1.47952 -3.0487e-06 o
-1.47952 -3.0487e-06 o
-1.49621 -6.57233e-07 o
-1.49621 -6.57233e-07 o
-1.49621 -6.57233e-07 o
-1.49621 -6.57233e-07 o
-1.50775 -1.34171e-06 o
-1.50775 -1.34171e-06 o
-1.52363 -1.55457e-06 o
-1.52363 -1.55457e-06 o
-1.52363 -1.55457e-06 o
-1.49621 -6.57233e-07 o
-1.68543 1.8701e-08 o
-1.66938 1.78734e-08 o
-1.66434 1.73172e-08 o
-1.64791 1.62072e-08 o
-1.64791 1.62072e-08 o
-1.64278 1.56152e-08 o
-1.64278 1.56152e-08 o
-1.64278 1.56152e-08 o
-1.66938 1.78734e-08 o
-1.66938 1.78734e-08 o
-1.68543 1.8701e-08 o
-1.68543 1.8701e-08 o
-1.68543 1.8701e-08 o
-1.35239 -6.05713e-05 o
-1.35272 -6.20191e-05 o
-1.35304 -6.01638e-05 o
-1.35304 -6.01638e-05 o
-1.35304 -6.01638e-05 o
-1.35347 -8.64558e-05 o
-1.3533 -6.10178e-05 o
-1.35304 -6.01638e-05 o
-1.35371 -8.55268e-05 o
-1.35353 -6.47066e-05 o
-1.35353 -6.47066e-05 o
-1.35395 -7.65952e-05 o
-1.35395 -7.65952e-05 o
-1.35395 -7.65952e-05 o
-1.35239 -6.05713e-05 o
-1.35272 -6.20191e-05 o
-1.35304 -6.01638e-05 o
-1.35298 -6.02481e-05 o
-1.3533 -6.10178e-05 o
-1.3533 -6.10178e-05 o
-1.35347 -8.64558e-05 o
-1.35347 -8.64558e-05 o
-1.35347 -8.64558e-05 o
-1.35352 -0.000140151 o
-1.35352 -0.000140151 o
-1.35365 -9.37676e-05 o
-1.35347 -8.64558e-05 o
-1.35374 -0.000152588 o
-1.35384 -9.01782e-05 o
-1.35384 -9.01782e-05 o
-1.35397 -0.000131883 o
-1.35397 -0.000131883 o
-1.35397 -0.000131883 o
-1.40825 -8.28906e-06 o
-1.42618 -4.95221e-06 o
-1.42439 -5.51529e-06 o
-1.42439 -5.51529e-06 o
-1.42439 -5.51529e-06 o
-1.44213 -3.86677e-06 o
-1.44213 -3.86677e-06 o
-1.44213 -3.86677e-06 o
-1.35295 -0.000138184 o
-1.35457 -0.000145204 o
-1.35373 -0.000120633 o
-1.54234 -4.18886e-07 o
-1.52363 -1.55457e-06 o
-1.54778 -2.69578e-07 o
-1.53013 -8.58352e-07 o
-1.53013 -8.58352e-07 o
-1.53616 -5.10121e-07 o
-1.53616 -5.10121e-07 o
-1.53616 -5.10121e-07 o
-1.56141 -7.16338e-08 o
-1.5499 -5.77351e-07 o
-1.53616 -5.10121e-07 o
-1.53994 -6.5711e-07 o
-1.52506 -9.24729e-07 o
-1.52506 -9.24729e-07 o
-1.51303 -1.50323e-06 o
-1.51303 -1.50323e-06 o
-1.51303 -1.50323e-06 o
-1.54778 -2.69578e-07 o
-1.53616 -5.10121e-07 o
-1.5639 -1.48902e-07 o
-1.55471 -2.89833e-07 o
-1.55471 -2.89833e-07 o
-1.56911 -6.48052e-08 o
-1.56911 -6.48052e-08 o
-1.56911 -6.48052e-08 o
-1.52363 -1.55457e-06 o
-1.54234 -4.18886e-07 o
-1.54234 -4.18886e-07 o
-1.45985 -3.42454e-06 o
-1.46316 -3.68208e-06 o
-1.46635 -3.72011e-06 o
-1.45845 -3.79453e-06 o
-1.46181 -3.44582e-06 o
-1.46181 -3.44582e-06 o
-1.45699 -4.00765e-06 o
-1.45699 -4.00765e-06 o
-1.45699 -4.00765e-06 o
-1.45022 -3.39119e-06 o
-1.4537 -3.38305e-06 o
-1.45699 -4.00765e-06 o
-1.44636 -3.68886e-06 o
-1.45008 -3.49865e-06 o
-1.45008 -3.49865e-06 o
-1.44213 -3.86677e-06 o
-1.44213 -3.86677e-06 o
-1.44213 -3.86677e-06 o
-1.46635 -3.72011e-06 o
-1.46728 -3.65183e-06 o
-1.4682 -3.52027e-06 o
-1.46181 -3.44582e-06 o
-1.46277 -3.48173e-06 o
-1.46277 -3.48173e-06 o
-1.45699 -4.00765e-06 o
-1.45699 -4.00765e-06 o
-1.45699 -4.00765e-06 o
-1.46462 -3.54042e-06 o
-1.46207 -3.64601e-06 o
-1.45822 -3.59874e-06 o
-1.45699 -4.00765e-06 o
-1.45417 -3.88618e-06 o
-1.45008 -3.49865e-06 o
-1.44685 -3.62527e-06 o
-1.44685 -3.62527e-06 o
-1.44213 -3.86677e-06 o
-1.44213 -3.86677e-06 o
-1.44213 -3.86677e-06 o
-1.46462 -3.54042e-06 o
-1.45822 -3.59874e-06 o
-1.4609 -3.53813e-06 o
-1.45417 -3.88618e-06 o
-1.45417 -3.88618e-06 o
-1.45699 -4.00765e-06 o
-1.45699 -4.00765e-06 o
-1.45699 -4.00765e-06 o
-1.45143 -3.85761e-06 o
-1.45084 -3.64024e-06 o
-1.45022 -3.39119e-06 o
-1.44625 -3.48984e-06 o
-1.44556 -3.6202e-06 o
-1.44556 -3.6202e-06 o
-1.44042 -4.32445e-06 o
-1.44042 -4.32445e-06 o
-1.44042 -4.32445e-06 o
-1.35304 -6.01638e-05 o
-1.35353 -6.47066e-05 o
-1.35395 -7.65952e-05 o
-1.35395 -7.65952e-05 o
-1.35395 -7.65952e-05 o
-1.32703 -0.000168955 o
-1.34079 -0.000223585 o
-1.34576 -0.000200687 o
-1.3517 -0.000153395 o
-1.3517 -0.000153395 o
-1.35279 -0.000130173 o
-1.35279 -0.000130173 o
-1.35279 -0.000130173 o
-1.32703 -0.000168955 o
-1.34576 -0.000200687 o
-1.35279 -0.000130173 o
-1.34491 -0.000194883 o
-1.35288 -0.000152558 o
-1.35288 -0.000152558 o
-1.35295 -0.000138184 o
-1.35295 -0.000138184 o
-1.35295 -0.000138184 o
-1.35446 -0.000128432 o
-1.35415 -0.000153328 o
-1.35295 -0.000138184 o
-1.35396 -0.00014319 o
-1.35288 -0.000152558 o
-1.35288 -0.000152558 o
-1.35279 -0.000130173 o
-1.35279 -0.000130173 o
-1.35279 -0.000130173 o
-1.35397 -0.000131883 o
-1.3537 -0.000155329 o
-1.35279 -0.000130173 o
-1.35311 -0.000144356 o
-1.3517 -0.000153395 o
-1.3517 -0.000153395 o
-1.35446 -0.000128432 o
-1.35396 -0.00014319 o
-1.35279 -0.000130173 o
-1.35421 -0.000136809 o
-1.3537 -0.000155329 o
-1.3537 -0.000155329 o
-1.35397 -0.000131883 o
-1.35397 -0.000131883 o
-1.35397 -0.000131883 o
-1.35239 -5.97289e-05 o
-1.35286 -7.13505e-05 o
-1.35286 -7.13505e-05 o
-1.35323 -9.41681e-05 o
-1.35323 -9.41681e-05 o
-1.35323 -9.41681e-05 o
-1.35098 -5.83714e-05 o
-1.35129 -6.20152e-05 o
-1.3516 -6.27431e-05 o
-1.35025 -5.4169e-05 o
-1.35024 -6.10271e-05 o
-1.35023 -6.07926e-05 o
-1.35061 -6.03279e-05 o
-1.35059 -5.7852e-05 o
-1.35059 -5.7852e-05 o
-1.35098 -5.83714e-05 o
-1.35098 -5.83714e-05 o
-1.35098 -5.83714e-05 o
-1.35098 -5.83714e-05 o
-1.34958 -5.74191e-05 o
-1.3499 -5.89167e-05 o
-1.35025 -5.4169e-05 o
-1.35025 -5.53378e-05 o
-1.35073 -3.79833e-05 o
-1.35073 -3.79833e-05 o
-1.35159 -4.33898e-05 o
-1.35159 -4.33898e-05 o
-1.35159 -4.33898e-05 o
-1.37298 -3.31758e-05 o
-1.3595 -1.86529e-05 o
-1.35248 -2.50021e-05 o
-1.35997 -1.90747e-05 o
-1.35259 -2.58582e-05 o
-1.35259 -2.58582e-05 o
-1.35272 -2.37417e-05 o
-1.35272 -2.37417e-05 o
-1.35272 -2.37417e-05 o
-1.37298 -3.31758e-05 o
-1.37298 -3.31758e-05 o
-1.37298 -3.31758e-05 o
-1.35015 -5.2179e-05 o
-1.35015 -5.2179e-05 o
-1.49277 -1.05385e-06 o
-1.49038 -1.26252e-06 o
-1.48807 -7.98899e-07 o
-1.48532 -2.42804e-06 o
-1.48316 -2.62571e-06 o
-1.48316 -2.62571e-06 o
-1.47819 -3.67659e-06 o
-1.47819 -3.67659e-06 o
-1.47819 -3.67659e-06 o
-1.47952 -3.0487e-06 o
-1.49277 -1.05385e-06 o
-1.47385 -3.36365e-06 o
-1.46932 -3.46516e-06 o
-1.46207 -3.64601e-06 o
-1.46207 -3.64601e-06 o
-1.46462 -3.54042e-06 o
-1.46462 -3.54042e-06 o
-1.46462 -3.54042e-06 o
-1.47819 -3.67659e-06 o
-1.47152 -3.54139e-06 o
-1.46462 -3.54042e-06 o
-1.47327 -3.75958e-06 o
-1.46643 -3.48787e-06 o
-1.46643 -3.48787e-06 o
-1.4682 -3.52027e-06 o
-1.4682 -3.52027e-06 o
-1.4682 -3.52027e-06 o
-1.47385 -3.36365e-06 o
-1.46932 -3.46516e-06 o
-1.46462 -3.54042e-06 o
-1.47604 -3.71551e-06 o
-1.47152 -3.54139e-06 o
-1.47152 -3.54139e-06 o
-1.47819 -3.67659e-06 o
-1.47819 -3.67659e-06 o
-1.47819 -3.67659e-06 o
-1.47385 -3.36365e-06 o
-1.47385 -3.36365e-06 o
-1.47385 -3.36365e-06 o
-1.48492 -1.88759e-06 o
-1.47941 -3.26567e-06 o
-1.47385 -3.36365e-06 o
-1.48652 -1.43933e-06 o
-1.48092 -3.31114e-06 o
-1.48092 -3.31114e-06 o
-1.48807 -7.98899e-07 o
-1.48807 -7.98899e-07 o
-1.48807 -7.98899e-07 o
-1.47385 -3.36365e-06 o
-1.47941 -3.26567e-06 o
-1.47941 -3.26567e-06 o
-1.48492 -1.88759e-06 o
-1.48492 -1.88759e-06 o
-1.48492 -1.88759e-06 o
-1.50078 -1.62469e-06 o
-1.49409 -1.35886e-06 o
-1.48807 -7.98899e-07 o
-1.50638 -1.78756e-06 o
-1.49786 -1.74045e-06 o
-1.49786 -1.74045e-06 o
-1.51303 -1.50323e-06 o
-1.51303 -1.50323e-06 o
-1.51303 -1.50323e-06 o
-1.56141 -7.16338e-08 o
-1.53994 -6.5711e-07 o
-1.51303 -1.50323e-06 o
-1.55262 -3.00481e-07 o
-1.52861 -1.03939e-06 o
-1.52861 -1.03939e-06 o
-1.50078 -1.62469e-06 o
-1.50638 -1.78756e-06 o
-1.51303 -1.50323e-06 o
-1.51824 -1.31484e-06 o
-1.52506 -9.24729e-07 o
-1.52506 -9.24729e-07 o
-1.53616 -5.10121e-07 o
-1.53616 -5.10121e-07 o
-1.53616 -5.10121e-07 o
-1.48492 -1.88759e-06 o
-1.48652 -1.43933e-06 o
-1.48807 -7.98899e-07 o
-1.49233 -1.40501e-06 o
-1.49409 -1.35886e-06 o
-1.49409 -1.35886e-06 o
-1.50078 -1.62469e-06 o
-1.50078 -1.62469e-06 o
-1.50078 -1.62469e-06 o
-1.49621 -6.57233e-07 o
-1.49847 -1.43864e-06 o
-1.50078 -1.62469e-06 o
-1.50775 -1.34171e-06 o
-1.5117 -2.01905e-06 o
-1.5117 -2.01905e-06 o
-1.52363 -1.55457e-06 o
-1.52363 -1.55457e-06 o
-1.52363 -1.55457e-06 o
-1.48492 -1.88759e-06 o
-1.49233 -1.40501e-06 o
-1.50078 -1.62469e-06 o
-1.49047 -1.29096e-06 o
-1.49847 -1.43864e-06 o
-1.49847 -1.43864e-06 o
-1.49621 -6.57233e-07 o
-1.49621 -6.57233e-07 o
-1.49621 -6.57233e-07 o
-1.58988 -2.335e-09 o
-1.57677 -5.78493e-09 o
-1.56141 -7.16338e-08 o
-1.58286 2.99303e-08 o
-1.56918 -7.05604e-08 o
-1.56918 -7.05604e-08 o
-1.58988 -2.335e-09 o
-1.58286 2.99303e-08 o
-1.59833 -4.19202e-09 o
-1.58008 3.32219e-08 o
-1.56911 -6.48052e-08 o
-1.5901 1.63037e-08 o
-1.57989 -1.02504e-08 o
-1.57989 -1.02504e-08 o
-1.58988 -2.335e-09 o
-1.58988 -2.335e-09 o
-1.58988 -2.335e-09 o
-1.56911 -6.48052e-08 o
-1.56545 -1.68302e-08 o
-1.56141 -7.16338e-08 o
-1.57989 -1.02504e-08 o
-1.57677 -5.78493e-09 o
-1.57677 -5.78493e-09 o
-1.58988 -2.335e-09 o
-1.58988 -2.335e-09 o
-1.58988 -2.335e-09 o
-1.61842 7.12068e-09 o
-1.63572 1.75999e-08 o
-1.63572 1.75999e-08 o
-1.35554 -1.11798e-05 o
-1.3681 -2.68809e-05 o
-1.38657 -1.38731e-05 o
-1.36017 -2.03112e-05 o
-1.37612 -2.28023e-05 o
-1.37612 -2.28023e-05 o
-1.3665 -2.84427e-05 o
-1.3665 -2.84427e-05 o
-1.3665 -2.84427e-05 o
-1.35554 -1.11798e-05 o
-1.36017 -2.03112e-05 o
-1.3665 -2.84427e-05 o
-1.35213 -2.11734e-05 o
-1.35518 -2.01108e-05 o
-1.35518 -2.01108e-05 o
-1.57387 -1.83834e-08 o
-1.58302 1.46162e-08 o
-1.59198 1.36237e-08 o
-1.58262 8.27333e-09 o
-1.59159 -6.41155e-09 o
-1.59159 -6.41155e-09 o
-1.59117 4.13304e-09 o
-1.59117 4.13304e-09 o
-1.59117 4.13304e-09 o
-1.57715 -7.19445e-08 o
-1.57715 -7.19445e-08 o
-1.57715 -7.19445e-08 o
-1.51636 -2.24308e-06 o
-1.53399 -1.09436e-06 o
-1.57387 -1.83834e-08 o
-1.5725 2.30399e-08 o
-1.57108 1.55608e-08 o
-1.56279 -1.85564e-07 o
-1.56112 -1.97522e-07 o
-1.56112 -1.97522e-07 o
-1.54868 -7.4129e-07 o
-1.54868 -7.4129e-07 o
-1.54868 -7.4129e-07 o
-1.35218 -5.86049e-05 o
-1.35194 -5.96697e-05 o
-1.35167 -5.86189e-05 o
-1.35175 -6.01444e-05 o
-1.35148 -5.82143e-05 o
-1.35148 -5.82143e-05 o
-1.3513 -5.86399e-05 o
-1.3513 -5.86399e-05 o
-1.3513 -5.86399e-05 o
-1.35112 -5.9023e-05 o
-1.35109 -5.72588e-05 o
-1.35109 -5.72588e-05 o
-1.3525 -5.94573e-05 o
-1.35209 -5.89041e-05 o
-1.35167 -5.86189e-05 o
-1.35234 -5.84842e-05 o
-1.35194 -5.96697e-05 o
-1.35194 -5.96697e-05 o
-1.35218 -5.86049e-05 o
-1.35218 -5.86049e-05 o
[truncated: 10,264 more rows]
